1 Title: A case-control study based on the National Health and Nutrition  
2 Examination Survey to evaluate the effects of human papilloma virus on bone  
3 health in women

4 Xiang Li, PhD<sup>1,2</sup>, Guangjun Jiao, PhD<sup>1,2</sup>, Yunzhen Chen, PhD<sup>1,2</sup>

5  
6 <sup>1</sup> Shandong University Cheeloo College of Medicine, Jinan, Shandong, China,  
7 250000

8 <sup>2</sup> Qilu Hospital of Shandong University, Department of Spine Surgery, Jinan,  
9 Shandong, China, 250000

10

11 Corresponding Authors: Guangjun Jiao and Yunzhen Chen

12 Corresponding Author's Institution: Department of Spine Surgery, Qilu Hospital,  
13 Shandong University

14 Postal Address of Corresponding Author: No.107, Wenhuxi Road, Lixia  
15 District, Jinan, 250000, China.

16 E-mail Address of Corresponding Author: qilucyz@yeah.net

17 Phone: +86 18560082566

18

19 Guangjun Jiao and Yunzhen Chen contributed equally as corresponding  
20 authors.

21

22

NOTE: This preprint reports new research that has not been certified by peer review and should not be used to guide clinical practice.

23 **Abstract**

24 **Background:** Globally, both human papillomavirus (HPV) infection and  
25 osteoporosis (OP) are more prevalent in women than in men. It remains  
26 unclear whether HPV has an impact on bone health.

27 **Methods:** This case–control study was based on data from the National  
28 Health and Nutrition Examination Survey (NHANES). Comparable datasets  
29 were created via the nearest neighbor propensity score matching (PSM)  
30 method (1:2). The Welch two-sample t test was used to analyze the  
31 association between HPV infection and bone mineral density (BMD).  
32 Restricted cubic spline (RCS) and Kendall's tau-b tests were used to explore  
33 the effect of HPV infection type on BMD.

34 **Results:** BMDs in the legs and lumbar spine were lower in subjects infected  
35 with HPV than in uninfected subjects. RCS analysis showed that the larger the  
36 number of cooccurring HPV types in a woman, the lower the BMD was. In  
37 addition, four HPV types were negatively associated with leg BMD, and 14  
38 HPV types were negatively associated with lumbar spine BMD. HPV types 53,  
39 59, and 89 had effects on both leg and lumbar spine BMDs.

40 **Conclusions:** HPV infection was associated with a decrease in BMD.  
41 Appropriately designed trials can help determine whether interventions to  
42 prevent HPV infection will have a protective effect on BMD.

43 **Funding:** This research was not supported by any specific grant from any  
44 funding agency in the public, commercial or not-for-profit sector.

45 **Keywords:** Women; Human papillomavirus; Bone mineral density; Correlation

46 **1. Introduction:**

47 Osteoporosis (OP) is one of the most common chronic diseases of the  
48 skeleton. It is characterized by a decrease in bone mineral density (BMD) and  
49 the destruction of bone structure[1, 2]. OP is of great clinical importance  
50 because OP is a major risk factor for fracture and greatly affects human  
51 health[3, 4]. It has been reported that there are more than 200 million OP  
52 patients worldwide[5, 6]. In some regions, the prevalence of OP is  
53 approximately 40% in the elderly population[7-9]. OP and associated fractures  
54 impose substantial economic and social burdens. OP, a complex disease, is  
55 associated with a variety of factors. A better understanding of emerging risk  
56 factors contributing to the disease may enable the development of prevention  
57 and treatment strategies targeting high-risk individuals.

58 Human papillomavirus (HPV) is one of the most recognized viruses in  
59 humans, with a fairly high infection rate (2-44%)[10-12]. Most individuals are  
60 exposed to HPV infection at some point in their lifetime. HPV resulting in  
61 lesions on the genitalia has become the most common sexually transmitted  
62 infection in the world. Moreover, HPV is also recognized as a causative factor  
63 for cervical cancer[13]. It is also a risk factor for several tumors[14-19]. The  
64 rate of HPV infection is significantly higher among women than among men[20,  
65 21]. This is similar to OP, for which female sex is a risk factor[22-24]. However,  
66 the role of HPV in the bone health of women is unclear, and no studies have

67 confirmed the association between HPV and BMD.

68 Here, we conducted a large case–control study based on National Health  
69 and Nutrition Examination Survey (NHANES) to explore the association  
70 between HPV and BMD. Elucidating the strength and pattern of this  
71 association will provide evidence to guide appropriate targeted public health  
72 interventions.

## 73 **2. Subjects and methods:**

### 74 **2.1 General information about the NHANES**

75 The National Center for Health Statistics of the Centers for Disease Control  
76 and Prevention in the United States conducted a multistage, stratified,  
77 large-scale, nationally representative study named the NHANES[25]. This  
78 cross-sectional survey collected demographic, dietary, examination, and  
79 questionnaire data. The NHANES protocol is described in detail elsewhere[26].  
80 In this study, the data were obtained from the 2009–2014 NHANES database.

### 81 **2.2 Definition of variables**

#### 82 **2.2.1 HPV infection**

83 All eligible female participants underwent vaginal swab sample collected.  
84 The obtained samples were tested with the Roche linear array HPV  
85 genotyping test to determine the presence of HPV infection and the type of  
86 HPV in cases of infection. This method can detect 37 HPV types: 6, 11, 16, 18,  
87 26, 31, 33, 35, 39, 40, 42, 45, 51, 52, 53, 54, 55, 56, 58, 59, 61, 62, 64, 66, 67,  
88 68, 69, 70, 71, 72, 73, 81, 82, 83, 84, 89, and IS39.

89 We included subjects who were not infected with HPV in group A and those  
90 who were infected (all types) into group B. Subjects with missing data were  
91 excluded.

### 92 **2.2.2 Measurement of BMD**

93 Dual energy X-ray absorptiometry was performed to detect the BMD of  
94 eligible female subjects. The scanning area included the whole body. However,  
95 in this study, we focused on only the BMD of the subjects' legs and lumbar  
96 spines.

97 For the data from 2009 to 2010, the BMD of the leg was the average of  
98 bilateral total femur BMD, and the BMD of the lumbar spine was the average of  
99 L1–4 BMD. For the data from 2011 to 2014, the BMD value of the leg was the  
100 average BMD in both legs. In addition, if the BMD value of one leg was missing,  
101 the BMD in that leg was considered the value of the other leg. Subjects for  
102 whom the BMD in the legs or lumbar spine could not be calculated were  
103 excluded.

### 104 **2.2.3 Covariates**

105 We included the following covariates of interest: age, race, education level,  
106 marital status, poverty-to-income ratio, smoking status, alcohol consumption  
107 status, diabetes, depression score and sleeping difficulty.

108 Smoking was defined as smoking  $\geq$  100 cigarettes in a lifetime[27]. Alcohol  
109 consumption was defined as having 4/5 or more drinks every day[28, 29].

110 Subjects were considered to have diabetes if they met one of the following

111 criteria: told by doctors or other health professionals they had diabetes, insulin  
112 use, or diabetes medication use to lower their blood sugar[30].

113 Subjects with a Patient Health Questionnaire (PHQ)-9 total score of  $\geq 10$   
114 were considered to have clinically relevant depression[8, 31]. Subjects who  
115 answered “yes” to the question “Have you ever been told by doctor that you  
116 have a sleep disorder?” were considered to have sleeping difficulty.

### 117 **2.3 Ethical statement**

118 The National Center for Health Statistics Research Ethics Review Board had  
119 approved the NHAHES. Therefore, NHANES data could be accessed without  
120 ethical or administrative permission.

### 121 **2.4 Statistical analyses**

122 We used normal Q-Q plots to test the distribution of the data. Welch  
123 two-sample t tests or nonparametric Mann–Whitney U tests were used to  
124 analyze continuous variables. Chi-square tests or Fisher’s exact tests were  
125 used to compare categorical variables.

126 Propensity score matching (PSM) has been shown to be effective in  
127 reducing selection bias in retrospective studies[7, 32, 33]. We first transformed  
128 BMD into a categorical variable based on whether BMD was  $\geq 1$ . Subsequently,  
129 PSM, using the 1:2 nearest neighbor matching algorithm, was used to match  
130 subjects.

131 In the case of nonlinear a priori associations, restricted cubic spline (RCS)  
132 models were used to describe dose–response relationships between the

133 continuous exposure and outcomes[34, 35]. In this study, RCS with five knots  
134 was used to further explore the association between HPV infection and BMD.

135 Finally, Kendall's tau-b test was used to analyze the association between  
136 HPV type and BMD. In this analysis, we calculated only the individual effects of  
137 each HPV type and did not consider interactions between different types.  
138 Since there were no subjects infected with only HPV type 26, 64 or 82, we  
139 could not analyze their effects.  $P < 0.05$  was considered statistically significant,  
140 and all tests were one-sided. Data extraction and merging, statistical analyses  
141 and figures were completed with R (version 4.1.1).

## 142 **3. Results:**

### 143 **3.1 Participant characteristics before matching**

144 After screening, a total of 4673 female subjects were included in the study.  
145 The mean age of group A ( $n = 2614$ ) was  $39 \pm 11.97$  years, and the mean age  
146 of group B ( $n = 2059$ ) was  $36.67 \pm 12.29$  years. Supplemental table 1 shows  
147 the comparisons of the baseline characteristics between the two groups. The  
148 results indicated statistically significant differences for the vast majority of  
149 characteristics ( $P < 0.001$ ). This suggested significant selection bias between  
150 the two groups of subjects. Therefore, performed PSM to eliminate this  
151 phenomenon.

### 152 **3.2 Construction of matched datasets**

153 After 1:2 matching, we obtained datasets for BMDs in the legs and lumbar  
154 spine. In total, 1066 subjects in group A and 533 subjects in group B were

155 included. Analysis of baseline characteristics showed that the selection bias  
156 had been eliminated ( $P > 0.05$ ). More detailed data are presented in  
157 Supplemental table 2 and Supplemental table 3. The BMD values of the legs  
158 and lumbar spine in the different age groups are shown in Fig. 1A. Normal Q-Q  
159 plots showed a significant normal distribution of BMD (Fig. 1B - D).

### 160 **3.3 Lower BMD in subjects with HPV infection**

161 Welch two-sample t tests showed a lower BMD in subjects infected with  
162 HPV in both the legs and lumbar spine ( $P < 0.001$ ). The decrease in BMD was  
163 greater in the lumbar spine than in the legs (Table 1). We performed RCS  
164 analysis to more clearly elucidate the association between HPV infection and  
165 BMD. In Fig. 2, we found a nonlinear association between the number of  
166 cooccurring HPV types and BMD ( $P$  for nonlinear association  $< 0.001$ ). The  
167 larger the number of cooccurring HPV types, the lower the BMD was.

168 Finally, we analyzed each HPV type in an attempt to identify those with the  
169 greatest impact on BMD. The data showed that four HPV types (06, 53, 59 and  
170 89) were negatively correlated with leg BMD ( $P < 0.05$ ). The strongest  
171 correlation was found for type 89 ( $r = -0.060$ ). Fourteen HPV types were  
172 negatively correlated with lumbar spine BMD. Among them, type 53 had the  
173 strongest correlation ( $r = -0.085$ ). There were three HPV types that had an  
174 effect on both leg and lumbar spine BMDs, namely, 53, 59 and 89. More  
175 detailed data are shown in Tables 2 and 3.

## 176 **4. Discussion:**



177 To date, the literature on the link between viral infection and OP is scarce.  
178 Viruses that have been shown to be associated with OP include human  
179 immunodeficiency virus (HIV), hepatitis B virus, hepatitis C virus, and severe  
180 acute respiratory syndrome coronavirus 2 (SARS-CoV-2)[36-40]. In the  
181 present study, we demonstrated that HPV infection led to a decrease in BMD.  
182 Combining the results of the PSM and RCS analyses, we concluded that the  
183 association between the two showed a nonlinear negative correlation. The  
184 larger the number of cooccurring HPV types, the lower the BMD was.

185 As mentioned earlier, we confirmed the association between HPV and BMD.  
186 However, it is important to determine the causal relationship between them. It  
187 often takes a long time for BMD to decline and eventually progress to OP.  
188 Compared to this process, HPV infection can be considered an immediate  
189 event. Therefore, we believe it is more likely that HPV infection caused the  
190 decline in BMD rather than the reverse. In addition, the results after statistical  
191 adjustment support our view. PSM eliminated selection bias, prevented our  
192 findings from being confounded by other factors, and improved the level of  
193 evidence.

194 However, the biological mechanisms underlying the decline in BMD due to  
195 HPV remain unclear. It is known that persistent HPV infection triggers a range  
196 of responses, including immunosuppression and abnormal cell destruction[41].  
197 Scott et al. conducted a prospective study and found increased IL-12  
198 concentrations in cervicovaginal lavage fluid specimens in women with

199 persistent HPV infection[42]. This may reflect IL-12-induced macrophage  
200 activation and associated subsequent chronic inflammation[43]. The tissue  
201 damage caused by inflammation is self-explanatory. In addition, cervical HPV  
202 infection also causes infiltration of macrophages and dendritic cells. The  
203 activation of these cells also leads to the release of TNF, IL-8 and IL-12[44, 45].  
204 In addition to effects on the immune system, effects of HPV on lipid  
205 metabolism have also generated concerns. Lipid metabolism (digestion,  
206 uptake, synthesis and peroxidation) is crucial in high-risk HPV infection. The  
207 lipid component of the cell membrane makes HPV infection more efficient[46].  
208 Oxidative stress and lipid peroxidation induced by HPV infection also promote  
209 cellular damage that may lead to cell death[47]. Although these effects are  
210 more pronounced in HPV-infected local tissues, prolonged effects likely lead to  
211 systemic damage, including bone damage.

212 We also noted a larger decline in BMD in the lumbar spine than in the legs in  
213 HPV-infected individuals. Fourteen HPV types were negatively associated with  
214 lumbar spine BMD, and this number was much higher than that associated  
215 with the legs (four types). This finding suggests that lumbar spine BMD is more  
216 sensitive than leg BMD. This finding is consistent with the findings of some  
217 previous studies to some extent. Snyder et al. found that testosterone  
218 increased BMD in older men and that the increase in spinal BMD was larger  
219 than that in the hip[48].

220 Finally, we would like to discuss HPV types 53, 59 and 89. All three types

221 were negatively associated with BMDs in the lumbar spine and legs. Public  
222 HPV preventive measures and the detection of HPV infection should  
223 additionally focus on these three HPV types. These three HPV types could  
224 also help reveal the biological mechanisms underlying the association of HPV  
225 with BMD.

226 Although our statistical analysis attenuated selection bias, some limitations  
227 remain in the present study. First, prospective evidence is still needed to truly  
228 determine the causal association between HPV infection and BMD decline.  
229 Second, elucidating the biological mechanisms of the association between  
230 HPV and BMD may require additional molecular experiments. Third, only 37  
231 HPV types were included in this study. However, there are many more types of  
232 HPV in existence. How HPV types not detected in the NHANES affect bones  
233 health in women is still unknown.

234 In conclusion, we used data from a nationally representative database of US  
235 adults and found a negative association between HPV infection and BMD in  
236 female subjects. The larger the number of cooccurring HPV types, the lower  
237 the BMD was.

#### 238 **Contributors:**

239 Yunzhen Chen and Guangjun Jiao planned the study and interpreted the  
240 analyses. Xiang Li collected data, planned the study, performed the analyses,  
241 produced the figures and tables, and drafted the manuscript. All authors  
242 contributed to the interpretation of the results and revision of the paper and

243 approved the final manuscript.

244 **Declaration of interests:**

245 The authors state that they have no conflicts of interest.

246 **Acknowledgments:**

247 Not applicable.

248 **Data sharing statement:**

249 The data generated during and/or analyzed during the current study are  
250 available from the corresponding author upon reasonable request.

251 **References:**

- 252 1. Zhu, X., W. Bai, and H. Zheng, *Twelve years of GWAS discoveries for osteoporosis and related*  
253 *traits: advances, challenges and applications*. Bone Res, 2021. **9**(1): p. 23.
- 254 2. Bellavia, D., et al., *Non-flavonoid polyphenols in osteoporosis: preclinical evidence*. Trends  
255 Endocrinol Metab, 2021. **32**(7): p. 515-529.
- 256 3. Yong, E.L. and S. Logan, *Menopausal osteoporosis: screening, prevention and treatment*.  
257 Singapore Med J, 2021. **62**(4): p. 159-166.
- 258 4. Yu, X.H., et al., *Birth weight is positively associated with adult osteoporosis risk: observational*  
259 *and Mendelian randomization studies*. J Bone Miner Res, 2021. **36**(8): p. 1469-1480.
- 260 5. Khatib, J., K. Stote, and A.R. Gosmanov, *Utility of DXA screening for diagnosis of osteoporosis*  
261 *in US veterans aged 70 years and older*. J Investig Med, 2018. **66**(2): p. 298-303.
- 262 6. Yang, T.S., et al., *Osteoporosis: prevalence in Taiwanese women*. Osteoporos Int, 2004. **15**(4):  
263 p. 345-7.
- 264 7. ROSENBAUM, P.R. and D.B. RUBIN, *The central role of the propensity score in observational*  
265 *studies for causal effects*. Biometrika, 1983. **70**(1): p. 41-55.
- 266 8. Yu, B., et al., *Trends in depression among Adults in the United States, NHANES 2005-2016*. J  
267 Affect Disord, 2020. **263**: p. 609-620.
- 268 9. Zhang, Q., et al., *Prevalence and contributing factors of osteoporosis in the elderly over 70*  
269 *years old: an epidemiological study of several community health centers in Shanghai*. Ann  
270 Palliat Med, 2020. **9**(2): p. 231-238.
- 271 10. Baseman, J.G. and L.A. Koutsky, *The epidemiology of human papillomavirus infections*. J Clin  
272 Virol, 2005. **32 Suppl 1**: p. S16-24.
- 273 11. Gjøoen, K., et al., *Prevalence of human papillomavirus in cervical scrapes, as analyzed by PCR,*  
274 *in a population-based sample of women with and without cervical dysplasia*. Apmis, 1996.  
275 **104**(1): p. 68-74.
- 276 12. Bosch, F.X. and S. de Sanjosé, *Chapter 1: Human papillomavirus and cervical cancer--burden*  
277 *and assessment of causality*. J Natl Cancer Inst Monogr, 2003(31): p. 3-13.

- 278 13. Peltecu, G., et al., *Human papilloma virus and cervical preinvasive disease*. J Med Life, 2009.  
279 2(4): p. 373-7.
- 280 14. Rezazadeh, A., et al., *The role of human papilloma virus in lung cancer: a review of the*  
281 *evidence*. Am J Med Sci, 2009. **338**(1): p. 64-7.
- 282 15. Torrente, M.C. and J.M. Ojeda, *Exploring the relation between human papilloma virus and*  
283 *larynx cancer*. Acta Otolaryngol, 2007. **127**(9): p. 900-6.
- 284 16. Jarzyński, A., et al., *Occurrence of BK Virus and Human Papilloma Virus in colorectal cancer*.  
285 Ann Agric Environ Med, 2017. **24**(3): p. 440-445.
- 286 17. Lightner, A.L., *Human Papilloma Virus and Anal Squamous Cell Cancer in IBD: Is It Time to*  
287 *Update Our Practice Parameters?* Dis Colon Rectum, 2017. **60**(12): p. 1231-1232.
- 288 18. Stratton, K.L. and D.J. Culin, *A Contemporary Review of HPV and Penile Cancer*. Oncology  
289 (Williston Park), 2016. **30**(3): p. 245-9.
- 290 19. de Martel, C., et al., *Worldwide burden of cancer attributable to HPV by site, country and HPV*  
291 *type*. Int J Cancer, 2017. **141**(4): p. 664-670.
- 292 20. Schiffman, M.H., *Recent progress in defining the epidemiology of human papillomavirus*  
293 *infection and cervical neoplasia*. J Natl Cancer Inst, 1992. **84**(6): p. 394-8.
- 294 21. Kjaer, S.K., et al., *High-risk human papillomavirus is sexually transmitted: evidence from a*  
295 *follow-up study of virgins starting sexual activity (intercourse)*. Cancer Epidemiol Biomarkers  
296 Prev, 2001. **10**(2): p. 101-6.
- 297 22. Wang, Y., et al., *Associated Factors for Osteoporosis and Fracture in Chinese Elderly*. Med Sci  
298 Monit, 2019. **25**: p. 5580-5588.
- 299 23. Gregson, C.L., et al., *UK clinical guideline for the prevention and treatment of osteoporosis*.  
300 Arch Osteoporos, 2022. **17**(1): p. 58.
- 301 24. Porter, J.L. and M. Varacallo, *Osteoporosis*, in StatPearls. 2022, StatPearls Publishing  
302 Copyright © 2022, StatPearls Publishing LLC.: Treasure Island (FL).
- 303 25. Juul, F., et al., *Ultra-processed food consumption among US adults from 2001 to 2018*. Am J  
304 Clin Nutr, 2022. **115**(1): p. 211-221.
- 305 26. Mei, Z., et al., *Physiologically based serum ferritin thresholds for iron deficiency in children*  
306 *and non-pregnant women: a US National Health and Nutrition Examination Surveys (NHANES)*  
307 *serial cross-sectional study*. Lancet Haematol, 2021. **8**(8): p. e572-e582.
- 308 27. Semenov, Y.R., et al., *Psoriasis and mortality in the United States: Data from the National*  
309 *Health and Nutrition Examination Survey*. J Am Acad Dermatol, 2021. **85**(2): p. 396-403.
- 310 28. Gay, I.C., D.T. Tran, and D.W. Paquette, *Alcohol intake and periodontitis in adults aged  $\geq 30$*   
311 *years: NHANES 2009-2012*. J Periodontol, 2018. **89**(6): p. 625-634.
- 312 29. Courtney, J.B., M.A. Russell, and D.E. Conroy, *Tobacco and cannabis use as moderators of the*  
313 *association between physical activity and alcohol use across the adult lifespan in the United*  
314 *States: NHANES, 2005–2016*. Preventive Medicine, 2022. **155**: p. 106931.
- 315 30. Al-Ibrahim, A.A. and R.T. Jackson, *Healthy eating index versus alternate healthy index in*  
316 *relation to diabetes status and health markers in U.S. adults: NHANES 2007-2010*. Nutr J,  
317 2019. **18**(1): p. 26.
- 318 31. Kroenke, K., R.L. Spitzer, and J.B. Williams, *The PHQ-9: validity of a brief depression severity*  
319 *measure*. J Gen Intern Med, 2001. **16**(9): p. 606-13.
- 320 32. Cho, S.M., et al., *Cerebrovascular Events in Patients With Centrifugal-Flow Left Ventricular*  
321 *Assist Devices: Propensity Score-Matched Analysis From the Intermacs Registry*. Circulation,

- 322 2021. **144**(10): p. 763-772.
- 323 33. Kaster, T.S., et al., *Risk of serious medical events in patients with depression treated with*  
324 *electroconvulsive therapy: a propensity score-matched, retrospective cohort study*. *Lancet*  
325 *Psychiatry*, 2021. **8**(8): p. 686-695.
- 326 34. Desquilbet, L. and F. Mariotti, *Dose-response analyses using restricted cubic spline functions*  
327 *in public health research*. *Stat Med*, 2010. **29**(9): p. 1037-57.
- 328 35. Li, S., W. Sun, and D. Zhang, *Association of Zinc, Iron, Copper, and Selenium Intakes with Low*  
329 *Cognitive Performance in Older Adults: A Cross-Sectional Study from National Health and*  
330 *Nutrition Examination Survey (NHANES)*. *J Alzheimers Dis*, 2019. **72**(4): p. 1145-1157.
- 331 36. Wijarnpreecha, K., et al., *Hepatitis C virus infection and risk of osteoporosis: A meta-analysis*.  
332 *Saudi J Gastroenterol*, 2017. **23**(4): p. 216-221.
- 333 37. Disser, N.P., et al., *Musculoskeletal Consequences of COVID-19*. *J Bone Joint Surg Am*, 2020.  
334 **102**(14): p. 1197-1204.
- 335 38. Hampson, G., et al., *Diagnosis and Management of Osteoporosis During COVID-19:*  
336 *Systematic Review and Practical Guidance*. *Calcif Tissue Int*, 2021. **109**(4): p. 351-362.
- 337 39. Dong, H.V., et al., *Osteoporosis and fractures in HIV/hepatitis C virus coinfection: a systematic*  
338 *review and meta-analysis*. *Aids*, 2014. **28**(14): p. 2119-31.
- 339 40. Xie, X., et al., *Association between hepatitis B virus infection and risk of osteoporosis: a*  
340 *systematic review and meta-analysis: A protocol for systematic review*. *Medicine (Baltimore)*,  
341 2020. **99**(16): p. e19719.
- 342 41. Moerman-Herzog, A. and M. Nakagawa, *Early Defensive Mechanisms against Human*  
343 *Papillomavirus Infection*. *Clin Vaccine Immunol*, 2015. **22**(8): p. 850-7.
- 344 42. Scott, M.E., et al., *Cervical cytokines and clearance of incident human papillomavirus infection:*  
345 *Hawaii HPV cohort study*. *Int J Cancer*, 2013. **133**(5): p. 1187-96.
- 346 43. Gately, M.K., et al., *The interleukin-12/interleukin-12-receptor system: role in normal and*  
347 *pathologic immune responses*. *Annu Rev Immunol*, 1998. **16**: p. 495-521.
- 348 44. Brennan, K. and A.G. Bowie, *Activation of host pattern recognition receptors by viruses*. *Curr*  
349 *Opin Microbiol*, 2010. **13**(4): p. 503-7.
- 350 45. Coleman, N., et al., *Immunological events in regressing genital warts*. *Am J Clin Pathol*, 1994.  
351 **102**(6): p. 768-74.
- 352 46. Siddiqi, A., J. Broniarczyk, and L. Banks, *Papillomaviruses and Endocytic Trafficking*. *Int J Mol*  
353 *Sci*, 2018. **19**(9).
- 354 47. Cruz-Gregorio, A., et al., *Lipid metabolism and oxidative stress in HPV-related cancers*. *Free*  
355 *Radical Biology and Medicine*, 2021. **172**: p. 226-236.
- 356 48. Snyder, P.J., et al., *Effect of Testosterone Treatment on Volumetric Bone Density and Strength*  
357 *in Older Men With Low Testosterone: A Controlled Clinical Trial*. *JAMA Intern Med*, 2017.  
358 **177**(4): p. 471-479.

359

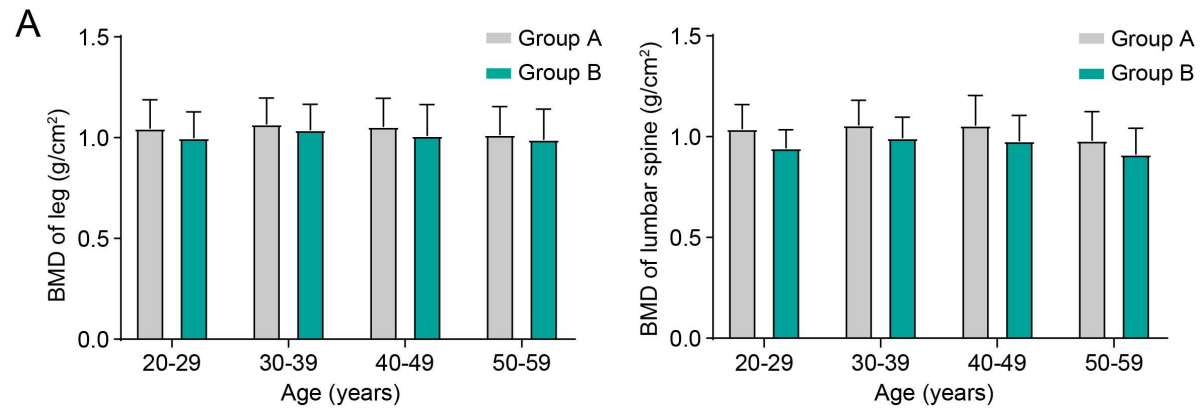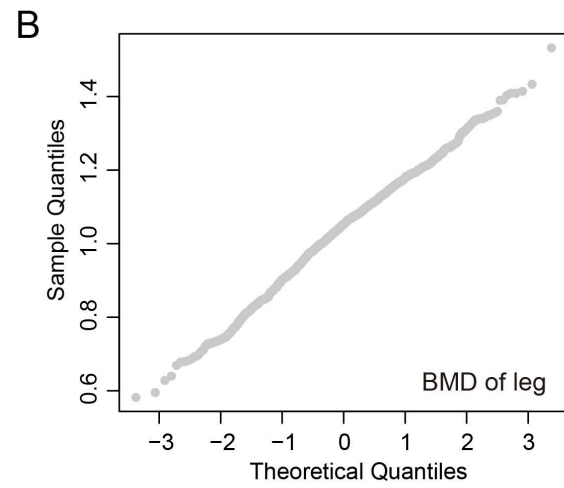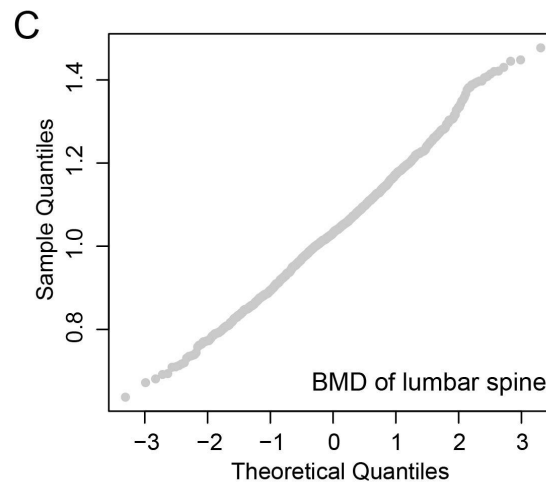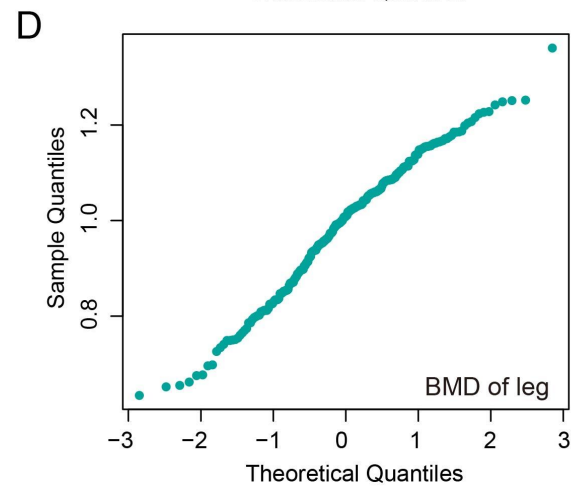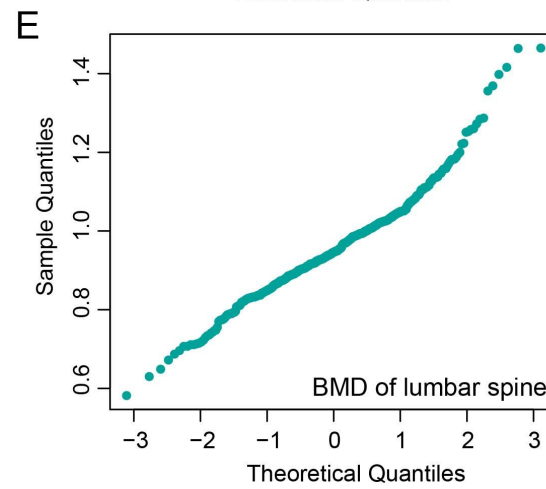

**Figure 1.** After matching, the bone mineral density (BMD) of leg and lumbar spine in different age groups (A). The normal Q-Q plots of BMD in group A (B, C) and group B (D, E).



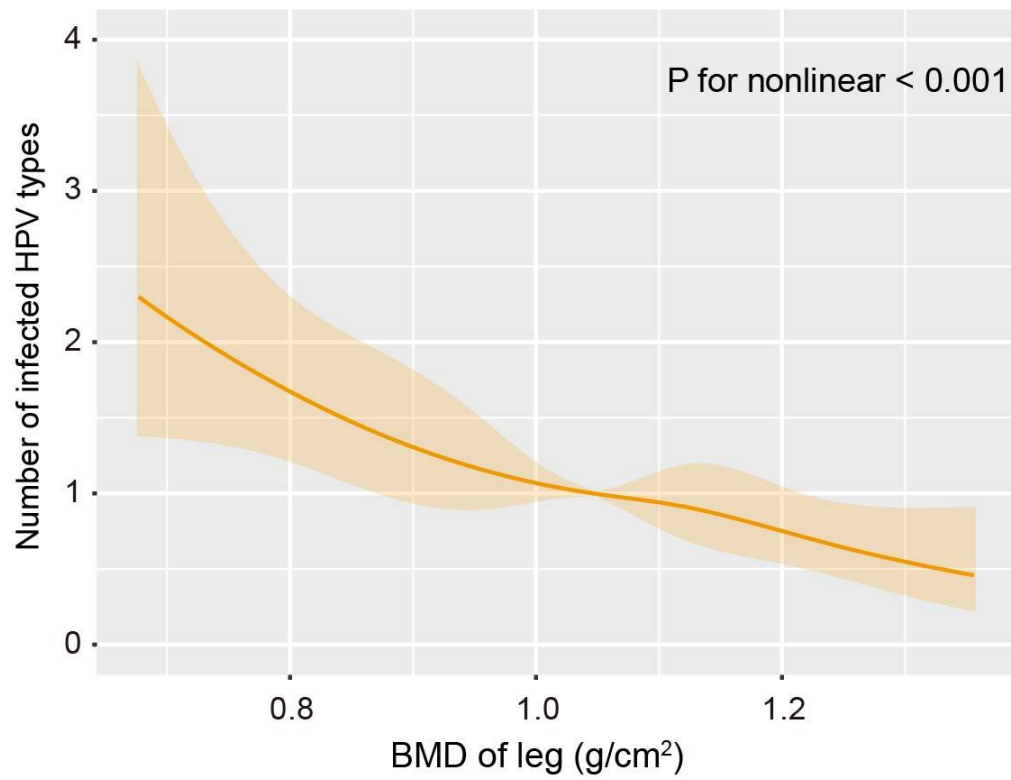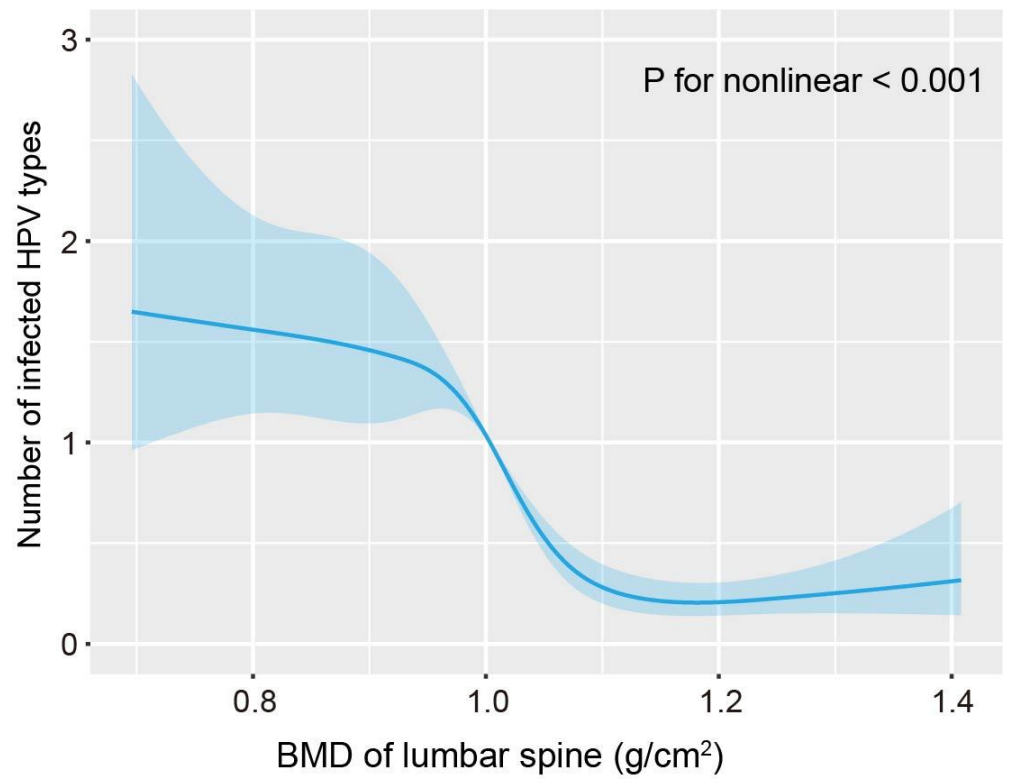

**Figure 2.** Restricted cubic spline models for the relationship between the number of infected HPV types and bone mineral density (BMD) after matching.

**Table 1.** Comparison of BMD between the two groups after matching.

| Characteristics                  | Group A<br>N = 1066 | Group B<br>N = 533 | P value |
|----------------------------------|---------------------|--------------------|---------|
| <sup>a</sup> BMD of leg          | 1.047±0.139         | 1.001±0.142        | < 0.001 |
| <sup>a</sup> BMD of lumbar spine | 1.035±0.137         | 0.956±0.118        | < 0.001 |

BMD, bone mineral density.

<sup>a</sup> The values were given as the mean and standard deviation.

P value was calculated by Welch two-sample t test.

**Table 2.** The correlation between HPV types and BMD of leg.

| Types | Coefficient | P value | Types | Coefficient | P value | Types | Coefficient | P value |
|-------|-------------|---------|-------|-------------|---------|-------|-------------|---------|
| 06    | -0.042      | .047    | 52    | -0.016      | .264    | 69    | 0.027       | .144    |
| 11    | -           | -       | 53    | -0.042      | .046    | 70    | 0.006       | .399    |
| 16    | -0.025      | .162    | 54    | 0.002       | .463    | 71    | 0.002       | .473    |
| 18    | -0.020      | .218    | 55    | -0.014      | .291    | 72    | -0.023      | .181    |
| 31    | -0.031      | .105    | 56    | 0.006       | .406    | 73    | 0.000       | .499    |
| 33    | -0.160      | .267    | 58    | 0.029       | .122    | 81    | -0.056      | .012    |
| 35    | 0.023       | .181    | 59    | -0.052      | .019    | 83    | 0.004       | .429    |
| 39    | -0.008      | .376    | 61    | 0.029       | .120    | 84    | -0.008      | .375    |
| 40    | -0.017      | .249    | 62    | -0.016      | .262    | 89    | -0.060      | .008    |
| 42    | 0.019       | .228    | 66    | -0.021      | .206    | IS39  | -0.009      | .353    |
| 45    | 0.025       | .159    | 67    | -0.001      | .488    |       |             |         |
| 51    | -0.011      | .331    | 68    | -0.013      | .298    |       |             |         |

BMD, bone mineral density.

P values were calculated by Kendall's tau-b correlation test.

HPV types that were statistically significant were marked in red.

Since there were no subjects infected with only HPV types 11, it was not possible to calculate their effects on the BMD of leg.

**Table 3.** The correlation between HPV types and BMD of lumbar spine.

| Types | Coefficient | P value | Types | Coefficient | P value | Types | Coefficient | P value |
|-------|-------------|---------|-------|-------------|---------|-------|-------------|---------|
| 06    | -0.028      | .134    | 52    | -0.010      | .340    | 69    | -0.015      | .270    |
| 11    | -0.038      | .066    | 53    | -0.085      | < .001  | 70    | -0.068      | .003    |
| 16    | -0.050      | .022    | 54    | -0.029      | .120    | 71    | 0.013       | .309    |
| 18    | -0.033      | .094    | 55    | -0.055      | .014    | 72    | -0.051      | .021    |
| 31    | -0.034      | .086    | 56    | -0.040      | .055    | 73    | -0.044      | .038    |
| 33    | -0.075      | .001    | 58    | -0.040      | .056    | 81    | -0.065      | .004    |
| 35    | 0.000       | .496    | 59    | -0.049      | .024    | 83    | -0.048      | .028    |
| 39    | -0.011      | .328    | 61    | -0.017      | .246    | 84    | -0.056      | .012    |
| 40    | -0.024      | .167    | 62    | -0.057      | .010    | 89    | -0.046      | .033    |
| 42    | -0.029      | .120    | 66    | -0.029      | .122    | IS39  | 0.033       | .091    |
| 45    | -0.022      | .194    | 67    | -0.030      | .115    |       |             |         |
| 51    | -0.026      | .152    | 68    | -0.042      | .047    |       |             |         |

BMD, bone mineral density.

P values were calculated by Kendall's tau-b correlation test.

HPV types that were statistically significant were marked in red.

**Supplemental table 1. Baseline characteristics for the total subjects  
before matching.**

| Characteristics                                      | Group A<br>N = 2614 | Group B<br>N = 2059 | P value |
|------------------------------------------------------|---------------------|---------------------|---------|
| <sup>a</sup> Age(years)                              | 39.00±11.97         | 36.67±12.29         | < 0.001 |
| <sup>a</sup> Poverty income ratio                    | 2.43±1.76           | 1.91±1.62           | < 0.001 |
| <sup>b</sup> Depression score (<10/≥10)              | 1450/269            | 1134/315            | < 0.001 |
| <sup>b</sup> Diabetes (positive/negative)            | 126/1933            | 169/2445            | .337    |
| <sup>b</sup> Trouble sleeping (positive/negative)    | 172/2439            | 168/1887            | .088    |
| <sup>b</sup> Alcohol consumption (positive/negative) | 712/1811            | 835/1115            | < 0.001 |
| <sup>b</sup> Drinking status (positive/negative)     | 130/1732            | 212/1419            | < 0.001 |
| <sup>b</sup> Education level                         |                     |                     | < 0.001 |
| Less than 9th grade                                  | 172                 | 109                 |         |
| 9 - 11th grade                                       | 272                 | 285                 |         |
| High school graduate/GED or equivalent               | 423                 | 435                 |         |
| Some college or AA degree                            | 777                 | 693                 |         |
| College graduate or above                            | 789                 | 378                 |         |
| <sup>b</sup> Race                                    |                     |                     | < 0.001 |
| Mexican American                                     | 456                 | 298                 |         |
| Other Hispanic                                       | 283                 | 219                 |         |
| Non-Hispanic White                                   | 1097                | 764                 |         |
| Non-Hispanic Black                                   | 379                 | 597                 |         |

|                             |      |     |         |
|-----------------------------|------|-----|---------|
| Non-Hispanic Asian          | 58   | 38  |         |
| Other Race                  | 341  | 143 |         |
| <sup>b</sup> Marital status |      |     | < 0.001 |
| Married                     | 1457 | 611 |         |
| Widowed                     | 36   | 49  |         |
| Divorced                    | 206  | 303 |         |
| Separated                   | 87   | 103 |         |
| Never married               | 459  | 596 |         |
| Living with partner         | 190  | 239 |         |

---

<sup>a</sup> The values were given as the mean and standard deviation.

<sup>b</sup> The values were given as the number of subjects.

P values were calculated by Welch two-sample t test or the Pearson chi-square test with Yates' continuity.

**Supplemental table 2. Baseline characteristics for subjects of leg BMD  
after matching.**

| Characteristics                                      | Group A<br>N = 1066 | Group B<br>N = 533 | P value |
|------------------------------------------------------|---------------------|--------------------|---------|
| <sup>a</sup> Age(years)                              | 39.21±11.25         | 39.93±11.48        | .233    |
| <sup>a</sup> Poverty income ratio                    | 2.50±1.65           | 2.37±1.67          | .144    |
| <sup>b</sup> Depression score (<10/≥10)              | 870/196             | 428/105            | .527    |
| <sup>b</sup> Diabetes (positive/negative)            | 73/993              | 39/494             | .729    |
| <sup>b</sup> Trouble sleeping (positive/negative)    | 103/963             | 62/471             | .222    |
| <sup>b</sup> Smoking status (positive/negative)      | 449/617             | 228/305            | .802    |
| <sup>b</sup> Alcohol consumption (positive/negative) | 449/617             | 228/305            | .802    |
| <sup>b</sup> Education level                         |                     |                    | .525    |
| Less than 9 <sup>th</sup> grade                      | 44                  | 27                 |         |
| 9 - 11 <sup>th</sup> grade                           | 137                 | 77                 |         |
| High school graduate/GED or equivalent               | 198                 | 109                |         |
| Some college or AA degree                            | 369                 | 169                |         |
| College graduate or above                            | 318                 | 151                |         |
| <sup>b</sup> Race                                    |                     |                    | .247    |
| Mexican American                                     | 141                 | 82                 |         |
| Other Hispanic                                       | 113                 | 60                 |         |
| Non-Hispanic White                                   | 528                 | 272                |         |
| Non-Hispanic Black                                   | 176                 | 69                 |         |



|                             |     |     |      |
|-----------------------------|-----|-----|------|
| Non-Hispanic Asian          | 21  | 8   |      |
| Other Race                  | 87  | 42  |      |
| <sup>b</sup> Marital status |     |     | .345 |
| Married                     | 520 | 247 |      |
| Widowed                     | 26  | 13  |      |
| Divorced                    | 108 | 71  |      |
| Separated                   | 48  | 21  |      |
| Never married               | 252 | 135 |      |
| Living with partner         | 112 | 46  |      |

---

BMD, bone mineral density.

<sup>a</sup> The values were given as the mean and standard deviation.

<sup>b</sup> The values were given as the number of subjects.

P values were calculated by Welch two-sample t test or the Pearson chi-square test with Yates' continuity.

**Supplemental table 3. Baseline characteristics for subjects of lumbar spine BMD after matching.**

| Characteristics                                      | Group A<br>N = 1066 | Group B<br>N = 533 | P value |
|------------------------------------------------------|---------------------|--------------------|---------|
| <sup>a</sup> Age(years)                              | 39.28±11.24         | 39.93±11.48        | .278    |
| <sup>a</sup> Poverty income ratio                    | 2.51±1.66           | 2.37±1.67          | .118    |
| <sup>b</sup> Depression score (<10/≥10)              | 870/196             | 428/105            | .527    |
| <sup>b</sup> Diabetes (positive/negative)            | 995/71              | 39/494             | .625    |
| <sup>b</sup> Trouble sleeping (positive/negative)    | 105/961             | 62/471             | .272    |
| <sup>b</sup> Smoking status (positive/negative)      | 455/611             | 228/305            | .971    |
| <sup>b</sup> Alcohol consumption (positive/negative) | 455/611             | 228/305            | .971    |
| <sup>b</sup> Education level                         |                     |                    | .568    |
| Less than 9 <sup>th</sup> grade                      | 44                  | 27                 |         |
| 9 - 11 <sup>th</sup> grade                           | 135                 | 77                 |         |
| High school graduate/GED or equivalent               | 203                 | 109                |         |
| Some college or AA degree                            | 367                 | 169                |         |
| College graduate or above                            | 317                 | 151                |         |
| <sup>b</sup> Race                                    |                     |                    | .279    |
| Mexican American                                     | 142                 | 82                 |         |
| Other Hispanic                                       | 113                 | 60                 |         |
| Non-Hispanic White                                   | 529                 | 272                |         |
| Non-Hispanic Black                                   | 174                 | 69                 |         |

|                             |     |     |      |
|-----------------------------|-----|-----|------|
| Non-Hispanic Asian          | 21  | 8   |      |
| Other Race                  | 87  | 42  |      |
| <sup>b</sup> Marital status |     |     | .354 |
| Married                     | 519 | 247 |      |
| Widowed                     | 26  | 13  |      |
| Divorced                    | 108 | 71  |      |
| Separated                   | 48  | 21  |      |
| Never married               | 253 | 135 |      |
| Living with partner         | 112 | 46  |      |

---

BMD, bone mineral density.

<sup>a</sup> The values were given as the mean and standard deviation.

<sup>b</sup> The values were given as the number of subjects.

P values were calculated by Welch two-sample t test or the Pearson chi-square test with Yates' continuity.
